# Supplementary material for: Tailoring Silicon Nitride Surface Chemistry for Facilitating Odontogenic Differentiation of Rat Dental Pulp Cells
Source: MDPI journal article supplement (doi:10.3390/ijms222313130), 2021-12-04
Supplement: s1 [file s1]

## Supplementary materials

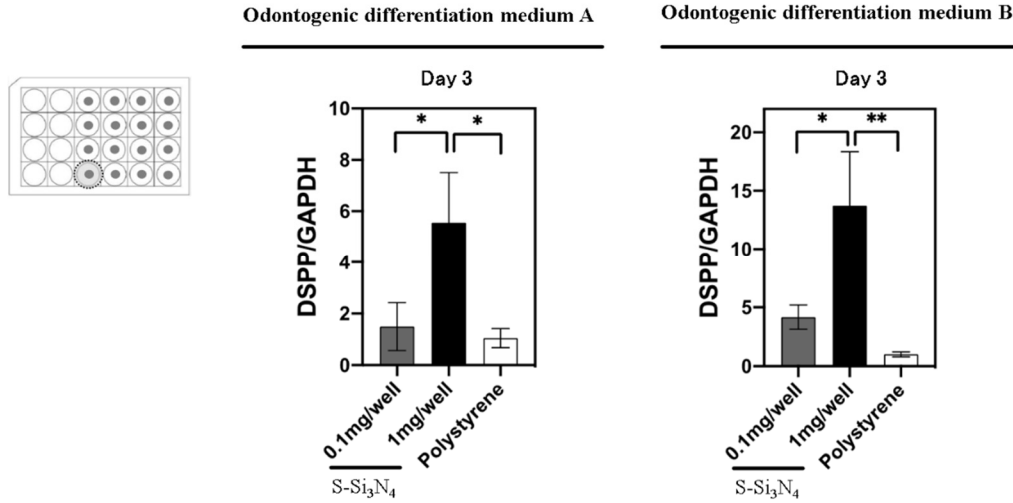

**Supplementary Figure S1.** Real-time qPCR to detect the expression of odontoblast-specific gene, *DSPP*, at day 3 on plates coated with S-Si<sub>3</sub>N<sub>4</sub>. Data are presented as the mean  $\pm$  standard deviation (SD) (n = 3, one-way analysis of variance and Tukey's multiple comparisons test). \* $p$  < 0.05, \*\* $p$  < 0.01: comparison among all groups. Osteogenic differentiation medium A: culture medium with 10 mM glycerol 2-phosphate, 10 nM dexamethasone, and 155  $\mu$ M L-ascorbic acid 2-phosphate; Osteogenic differentiation medium B: culture medium with 10 mM glycerol 2-phosphate, 100 nM dexamethasone, and 50  $\mu$ M L-ascorbic acid 2-phosphate. S-Si<sub>3</sub>N<sub>4</sub>: Sintered Si<sub>3</sub>N<sub>4</sub> with 3wt.% Y<sub>2</sub>O<sub>3</sub>.
